# Supplementary material
Source: PubMed Central journal article supplement (PMC4114723)
Supplement: NIHMS606598-supplement-01.pdf [file NIHMS606598-supplement-01.pdf]

## Supplementary Information Titles

**Journal:** Nature Medicine

**Article Title:** Circulating Angiotensin-like-4 links proteinuria with hypertriglyceridemia in nephrotic syndrome

**Corresponding Author:** Sumant Singh Chugh

### Supplementary Items and Titles

Supplementary Table 1: Clinical summary and fasting plasma Angptl4 levels of subjects with nephrotic syndrome and healthy controls subjects.

Supplementary Figure 1: Circulating Angptl4 in nephrotic syndrome.

Supplementary Figure 2: Changes in lipoprotein lipase (LPL) expression in nephrotic syndrome.

Supplementary Figure 3: Urinary loss of Angptl4 and lipoprotein lipase (LPL) in nephrotic syndrome.

Supplementary Figure 4: Differences between plasma and urinary free fatty acids (FFA) in human and experimental nephrotic syndrome.

Supplementary Figure 5: Mechanisms of Angptl4 upregulation and action.

Supplementary Figure 6: Methods section data.

| Diagnosis | Age (years) | Sex    | Angptl4 (ng per ml) | Diagnosis                      | Age (years) | Sex    | Angptl4 (ng per ml) |
|-----------|-------------|--------|---------------------|--------------------------------|-------------|--------|---------------------|
| Control   | 42          | Male   | 47.9                | FSGS tip lesion                | 46          | Male   | 378.92              |
| Control   | 52          | Male   | 50.14               | Recurrent FSGS                 | 12          | Female | 113.46              |
| Control   | 27          | Female | 119.28              | Recurrent FSGS                 | 46          | Female | 185.26              |
| Control   | 31          | Female | 49.12               | Recurrent FSGS                 | 53          | Female | 166.18              |
| Control   | 18          | Male   | 44.78               | Recurrent FSGS                 | 38          | Male   | 140.08              |
| Control   | 19          | Male   | 89.34               | Recurrent FSGS                 | 44          | Female | 75.38               |
| Control   | 31          | Female | 65.74               | Recurrent FSGS                 | 58          | Male   | 495.22              |
| Control   | 28          | Female | 71.32               |                                |             |        |                     |
| Control   | 45          | Female | 48.32               | FSGS <sup>#</sup>              | 23          | Female | 74.22               |
| Control   | 30          | Female | 42.88               | FSGS <sup>#</sup>              | 12          | Female | 93.94               |
| Control   | 28          | Female | 35.46               | FSGS <sup>#</sup>              | 3           | Male   | 152.68              |
| Control   | 18          | Female | 24.78               | FSGS <sup>#</sup>              | 17          | Male   | 45.48               |
| Control   | 30          | Female | 58.76               | FSGS <sup>#</sup>              | 14          | Male   | 100.34              |
| Control   | 18          | Male   | 53.06               | FSGS <sup>#</sup>              | 13          | Female | 66.7                |
| Control   | 50          | Male   | 67.7                | FSGS <sup>#</sup>              | 20          | Female | 158.24              |
| Control   | 20          | Male   | 62.14               | FSGS <sup>#</sup>              | 15          | Male   | 247.44              |
| Control   | 28          | Male   | 92.54               | FSGS <sup>#</sup>              | 25          | Male   | 131.02              |
| Control   | 45          | Male   | 63.26               | FSGS <sup>#</sup>              | 14          | Female | 139                 |
| Control   | 39          | Male   | 45.08               | FSGS <sup>#</sup>              | 14          | Male   | 306.68              |
|           |             |        |                     | FSGS <sup>#</sup>              | 32          | Male   | 45.28               |
| MCD       | 16          | Female | 181.16              | FSGS <sup>#</sup>              | 8           | Female | 32.04               |
| MCD*      | 14          | Female | 316.57              | FSGS <sup>#</sup>              | 11          | Female | 95.82               |
| MCD*      | 14          | Female | 206.29              |                                |             |        |                     |
| MCD*      | 4           | Male   | 74.41               | Non-HIV CG                     | 25          | Female | 176.9               |
| MCD*      | 10          | Male   | 49.81               | Non-HIV CG                     | 18          | Female | 110.24              |
| MCD       | 19          | Male   | 156.72              | Non-HIV CG                     | 29          | Male   | 195.26              |
| MCD       | 32          | Female | 144.92              | Non-HIV CG                     | 30          | Female | 228.5               |
| MCD       | 51          | Female | 710.26              | Non-HIV CG                     | 32          | Female | 200.02              |
| MCD       | 52          | Male   | 191.26              | Non-HIV CG                     | 34          | Female | 243.66              |
| MCD       | 22          | Male   | 571.6               | Non-HIV CG                     | 18          | Female | 591.42              |
|           |             |        |                     | Non-HIV CG                     | 22          | Female | 408.48              |
| MN*       | 59          | Male   | 1195.7              | Non-HIV CG                     | 26          | Female | 330.54              |
| MN*       | 63          | Male   | 138.62              | Non-HIV CG                     | 24          | Male   | 152.68              |
| MN*       | 31          | Female | 193.6               | Non-HIV CG                     | 16          | Female | 343.32              |
| MN*       | 52          | Male   | 92.38               | Non-HIV CG                     | 47          | Male   | 473.9               |
| MN        | 7           | Female | 128.94              | Non-HIV CG                     | 37          | Female | 168.22              |
| MN        | 57          | Male   | 86.24               | Non-HIV CG                     | 28          | Female | 74                  |
|           |             |        |                     | Non-HIV CG                     | 18          | Male   | 43.88               |
| FSGS      | 22          | Male   | 148.78              | Non-HIV CG                     | 29          | Male   | 154.12              |
| FSGS      | 23          | Female | 158.36              | Non-HIV CG                     | 40          | Female | 137.24              |
| FSGS      | 28          | Male   | 136.5               | Non-HIV CG                     | 55          | Male   | 346.3               |
| FSGS*     | 49          | Male   | 148.05              | Recurrent non-HIV CG           | 36          | Male   | 64.76               |
| FSGS*     | 29          | Female | 141.66              |                                |             |        |                     |
| FSGS*     | 9           | Male   | 294.17              | Transplant non-HIV CG, de novo | 35          | Male   | 97.78               |
| FSGS*     | 8           | Male   | 210.86              |                                |             |        |                     |

**Supplementary table 1:** Clinical summary and fasting plasma Angptl4 levels of subjects with nephrotic syndrome and healthy controls subjects. Asterisk indicates plasma obtained from a previously published study<sup>7</sup>. # indicates baseline sample from the FSGS clinical trial<sup>29</sup>.

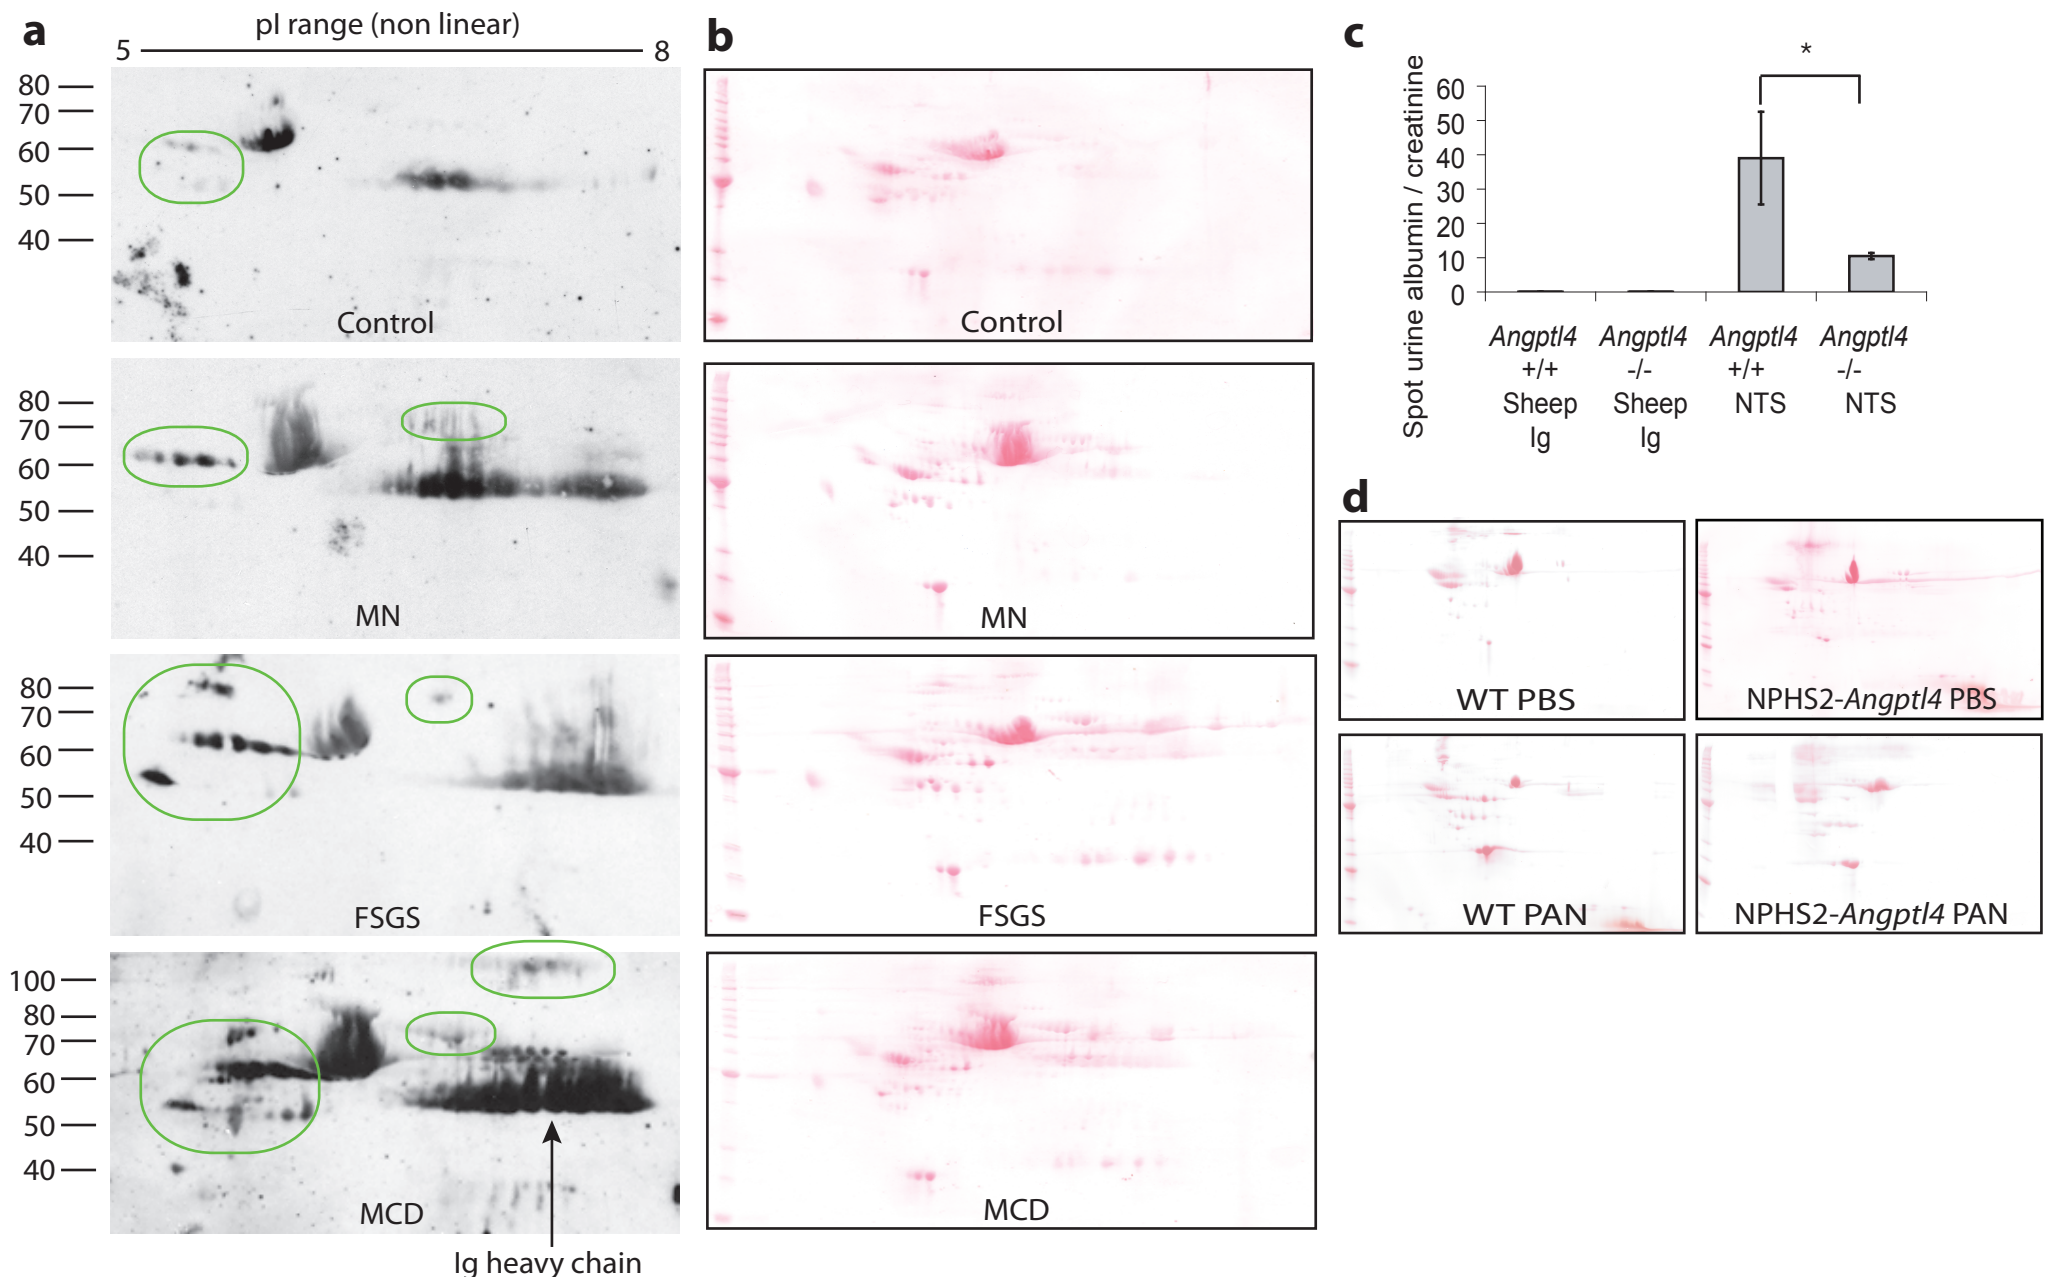

**Supplementary Figure 1:** Circulating Angptl4 in nephrotic syndrome. **(a)** Cropped images of 2-dimensional gel electrophoresis and Western blots of plasma from representative individuals with membranous nephropathy (MN), focal and segmental glomerulosclerosis (FSGS) and minimal change disease (MCD) using an anti-Angptl4 antibody. Angptl4 spots are enclosed in green circles / ovals. **(b)** Images of ponceau red stained nitrocellulose membranes corresponding to Western blots shown in panel a. **(c)** Albuminuria in *Angptl4*<sup>+/+</sup> and *Angptl4*<sup>-/-</sup> mice 48 hours after injection of  $\gamma$ 2-nephrotoxic serum (NTS), corresponds to **Fig. 1h** ( $n = 4$  mice / group). Image is reproduced from the on line supplement of Reference 7. Similar result was seen on Day 2 of study shown in **Fig. 5i**. **(d)** Images of ponceau red stained nitrocellulose membranes used for Western blot in **Fig. 2d**. Error bars are s.e.m. t test, 2 way, \*  $P < 0.05$ .

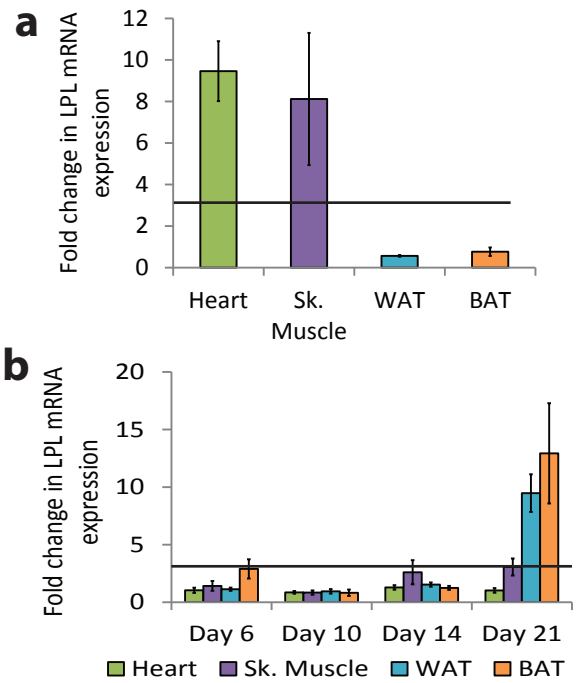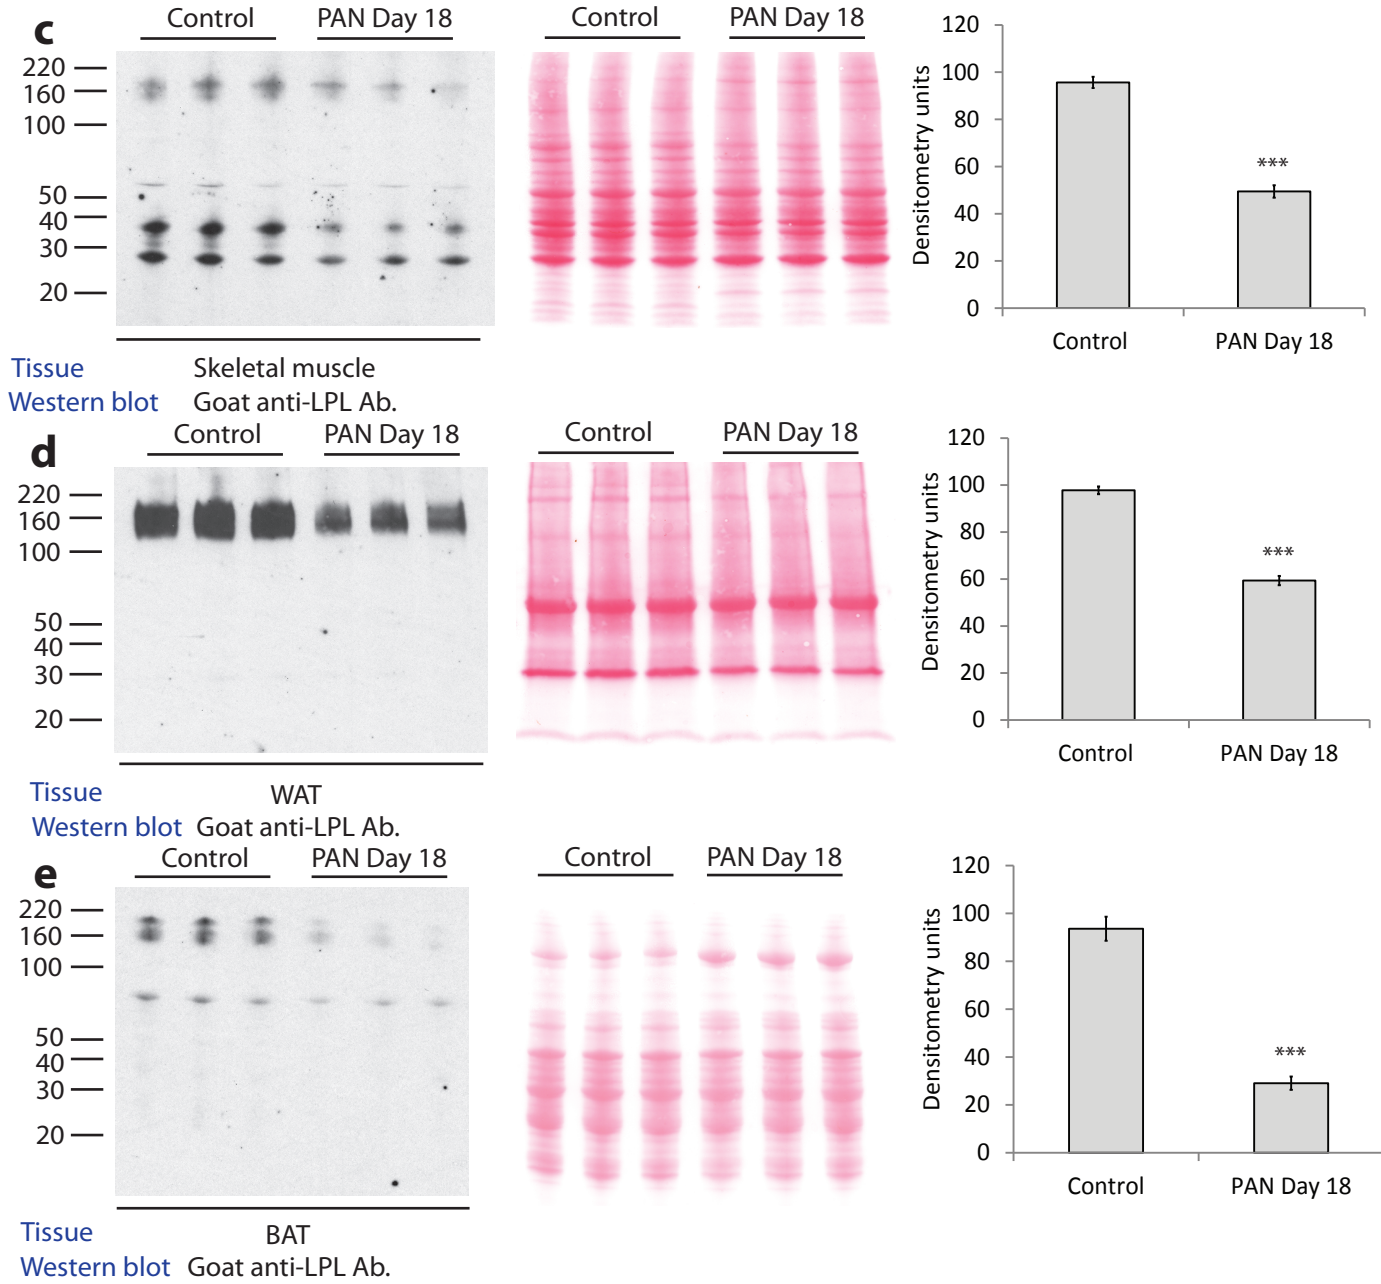

**Supplementary Figure 2:** Changes in lipoprotein lipase (LPL) expression in nephrotic syndrome. **(a)** mRNA expression profile of major organs that express LPL in aP2-Angptl4 transgenic rats ( $n = 6$  templates / organ). **(b)** Multi-organ mRNA expression profile for LPL in Sprague Dawley rats with high dose puromycin aminonucleoside nephrosis (PAN,  $n = 6$  templates / organ / time point). In panels a and b, threshold for significance was threefold change. **(c)** Assessment of LPL protein expression in skeletal muscle during the peripheral phase of Angptl4 expression in high dose PAN using non reducing SDS PAGE and Western blot (left), including ponceau red stained nitrocellulose membrane to demonstrate equal loading of protein (middle) and densitometry of LPL monomers and oligomers (right, sum of all bands). **(d)** Assessment of LPL protein expression in white adipose tissue (WAT) during the peripheral phase of Angptl4 expression in PAN using non reducing SDS PAGE and Western blot (left), including ponceau red stained nitrocellulose membrane to demonstrate equal loading of protein (middle) and densitometry of LPL monomers and oligomers (right). **(e)** Assessment of LPL protein expression in brown adipose tissue (BAT) during the peripheral phase of Angptl4 expression in PAN using non reducing SDS PAGE and Western blot (left), including ponceau red stained nitrocellulose membrane to demonstrate equal loading of protein (middle) and densitometry of LPL monomers and oligomers (right, sum of all bands). Error bars are s.e.m. t test, 2 way, \*\*\*  $P < 0.001$ .

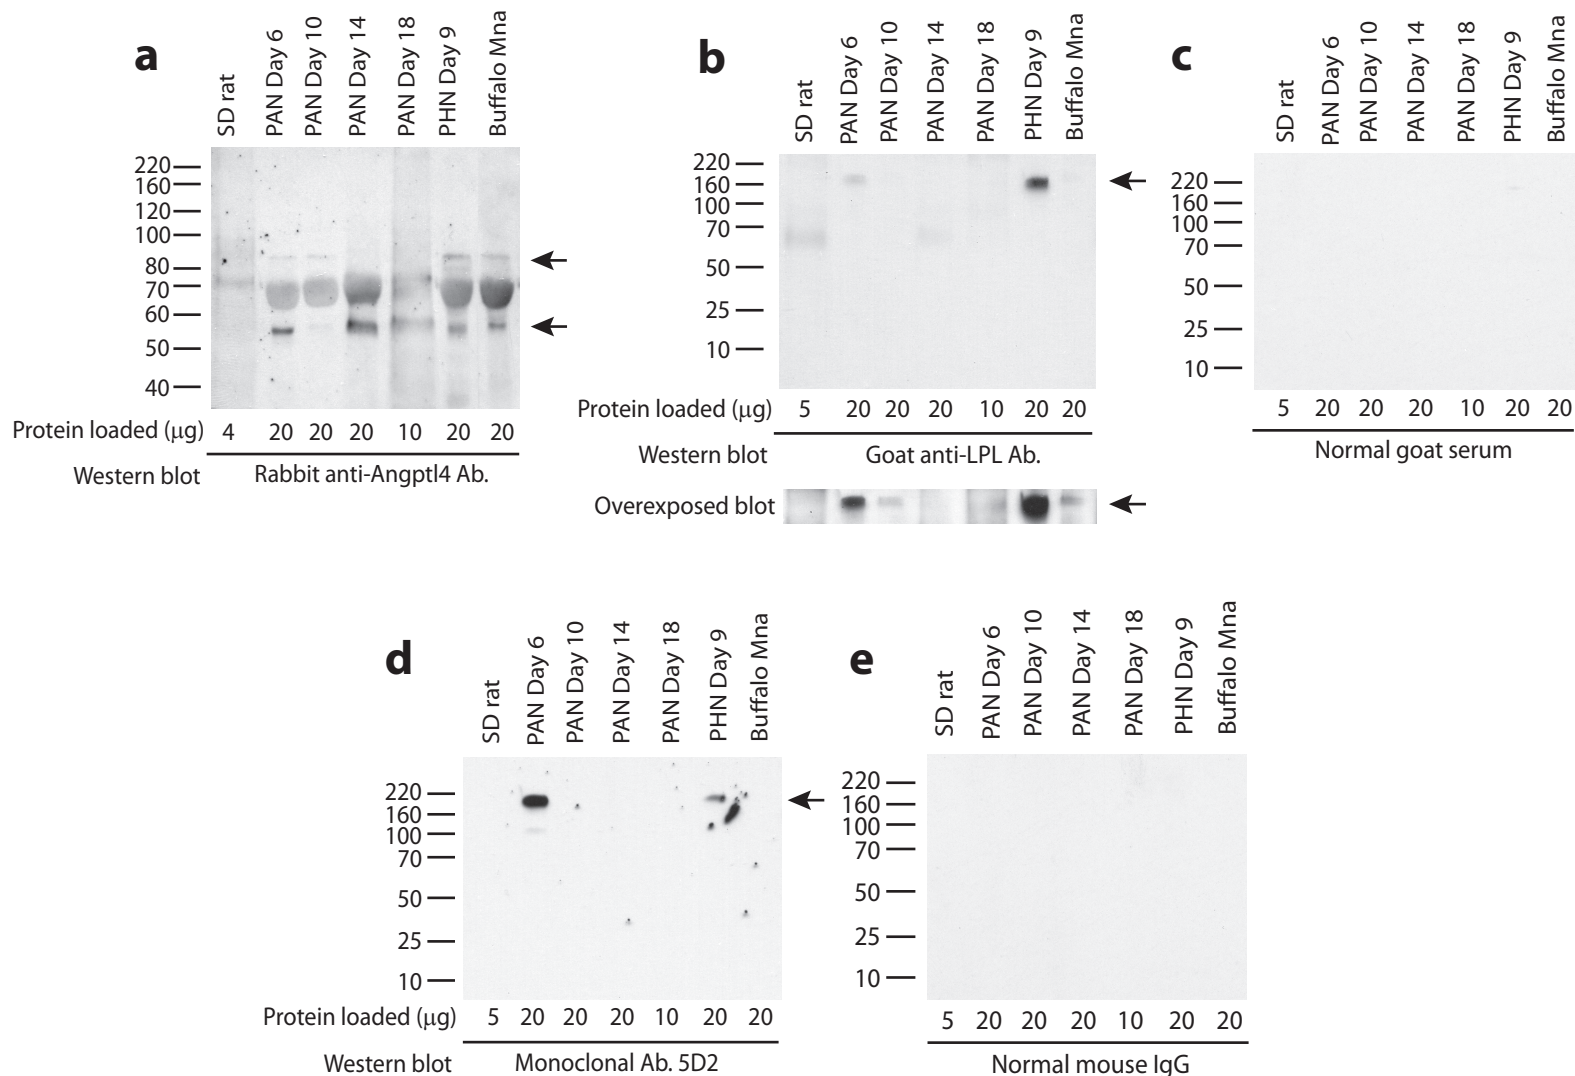

**Supplementary Figure 3:** Urinary loss of Angptl4 and lipoprotein lipase (LPL) in nephrotic syndrome. **(a)** Representative reducing SDS PAGE and Western blots of urine from normal Sprague Dawley (SD), puromycin aminonucleoside nephrosis (PAN), passive Heymann nephritis (PHN), and Buffalo Mna rats. Black arrows point towards Angptl4 bands. Albumin blush is also noted in PAN, PHN and Buffalo Mna rats between 65 and 70 kDa. **(b)** Non-reducing SDS PAGE and Western blot of urine from nephrotic rats using goat anti LPL antibody to assess for urinary loss of LPL (arrow). The overexposed blot cropped at the level of LPL is shown at the bottom. **(c)** Image of Western blot shown in panel b after being stripped and incubated with normal goat serum. **(d)** Non-reducing SDS PAGE and Western blot of nephrotic rat urine using anti-LPL monoclonal antibody 5D2 to identify active LPL (arrow). **(e)** Image of Western blot shown in panel d after being stripped and incubated with normal mouse IgG.

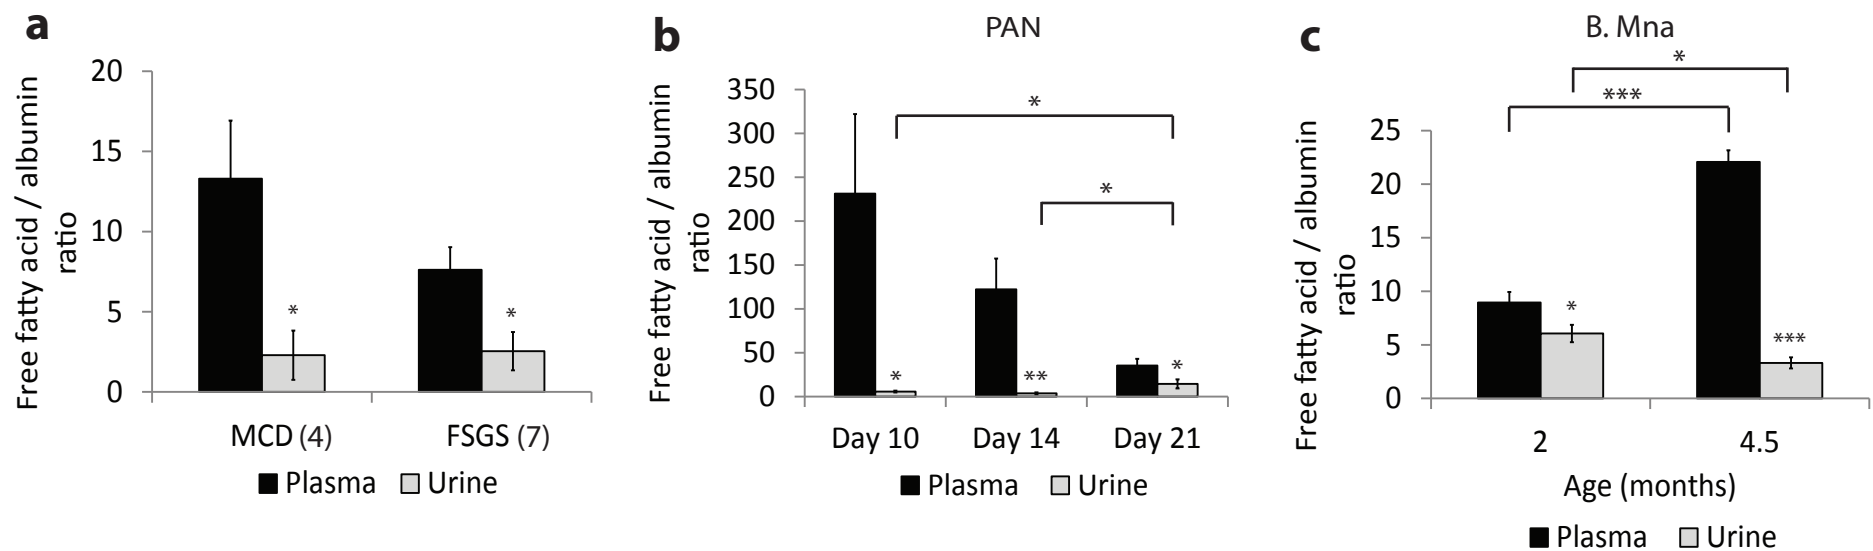

**Supplementary Figure 4:** Differences between plasma and urinary free fatty acids (FFA) in human and experimental nephrotic syndrome. Albumin is a carrier protein for FFA. **(a)** Urine and plasma FFA (measured in  $\mu\text{M}$ ) to albumin (measured in  $\text{gm L}^{-1}$ ) ratio in a subset of individuals with minimal change disease (MCD) and focal and segmental glomerulosclerosis (FSGS) in which both samples were obtained during the same clinic visit. The number of subjects is shown in brackets. **(b)** Plasma and urine FFA/albumin ratio in puromycin aminonucleoside nephrosis (PAN) during the peripheral phase on Angptl4 expression ( $n = 4$  values / group). **(c)** Plasma and urine FFA/albumin ratio before (age 2 months,  $n = 4$  values / group) and after (age 4.5 months,  $n = 19$  values / group) the development of nephrotic range proteinuria in Buffalo Mna (B. Mna) rats. Error bars are s.e.m. t test, 2 way, except panel c age 2 months is 1 way, \*  $P < 0.05$ ; \*\*  $P < 0.01$ ; \*\*\*  $P < 0.001$ .

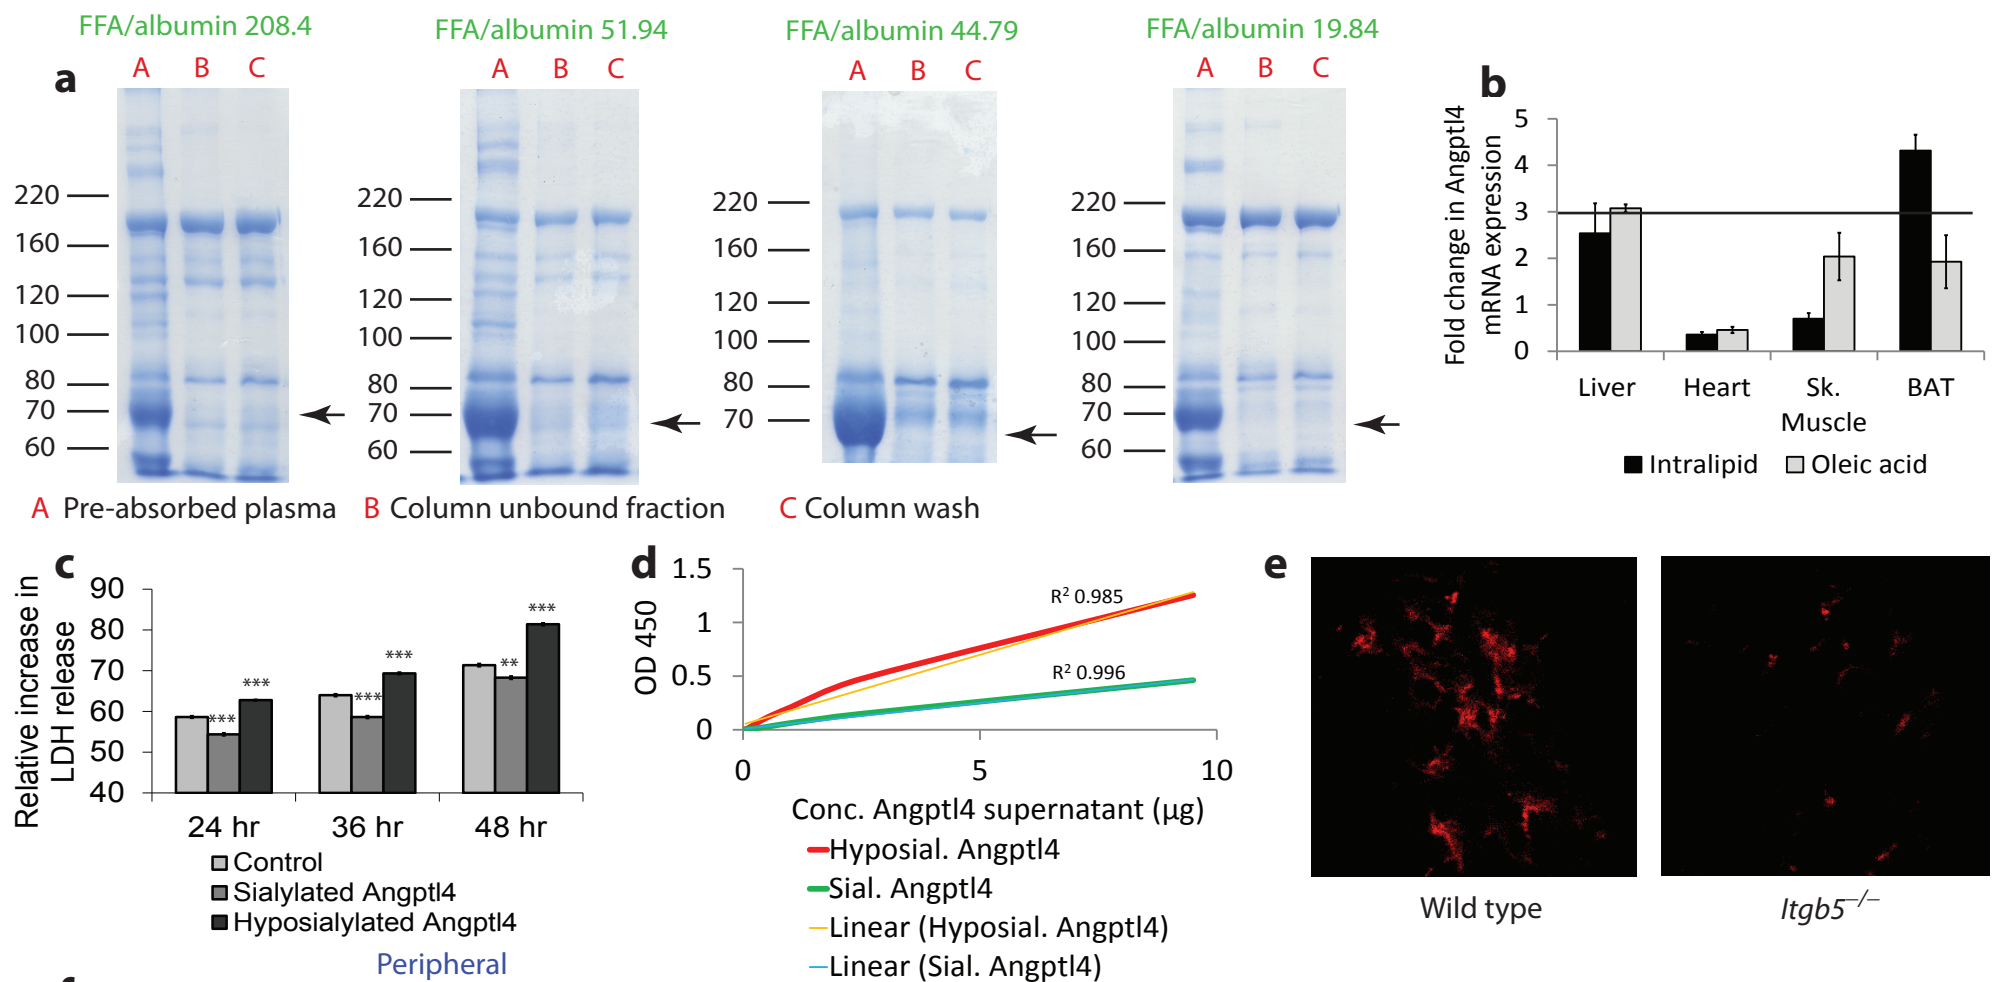

**Supplementary Figure 5:** Mechanisms of Angptl4 upregulation and action. **(a)** GelCode blue stained reducing SDS PAGE of human plasma from **Fig. 3e**, before and after affinity absorption of albumin to assess for albumin depletion (arrow) in the column unbound and first column wash fractions. **(b)** Changes in peripheral organ Angptl4 mRNA expression ( $n = 6$  templates / organ / group) in 10 month old Buffalo Mna rats after 3 days of treatment with Intralipid or oleic acid relative to control saline treated animals. Threshold for significance was threefold change (horizontal line). **(c)** Comparison of the effects of recombinant sialylated rat Angptl4 shown in **Fig. 5c** with recombinant hyposialylated Angptl4 on apoptosis induced in cultured rat glomerular endothelial cells using  $H_2O_2$  induced oxidative stress ( $n = 3$  readings / group). Statistical comparisons were made with corresponding control groups. **(d)** In vitro plate adhesion assays to study the interaction of sialylated and hyposialylated Angptl4 with purified  $\alpha_v\beta_5$  ( $n = 3$  readings / value). Linear regression slopes are superimposed. **(e)** Confocal images of glomeruli using anti-V5 antibody (red) to detect presence of recombinant rat Angptl4-V5 two hours after injection into wild type (left) and *Itgb5*<sup>-/-</sup> (right) mice. **(f)** Plasma Angptl4 levels during the peripheral phase of Angptl4 production in  $\gamma$ 2-nephrotoxic serum (NTS) injected wild type and *Itgb5*<sup>-/-</sup> mice shown in **Fig. 5d,e** ( $n = 5$  readings / group). Statistical comparisons were made with Day 0 values. Error bars are s.e.m. t test, 2 way, \*  $P < 0.05$ ; \*\*  $P < 0.01$ ; \*\*\*  $P < 0.001$ .

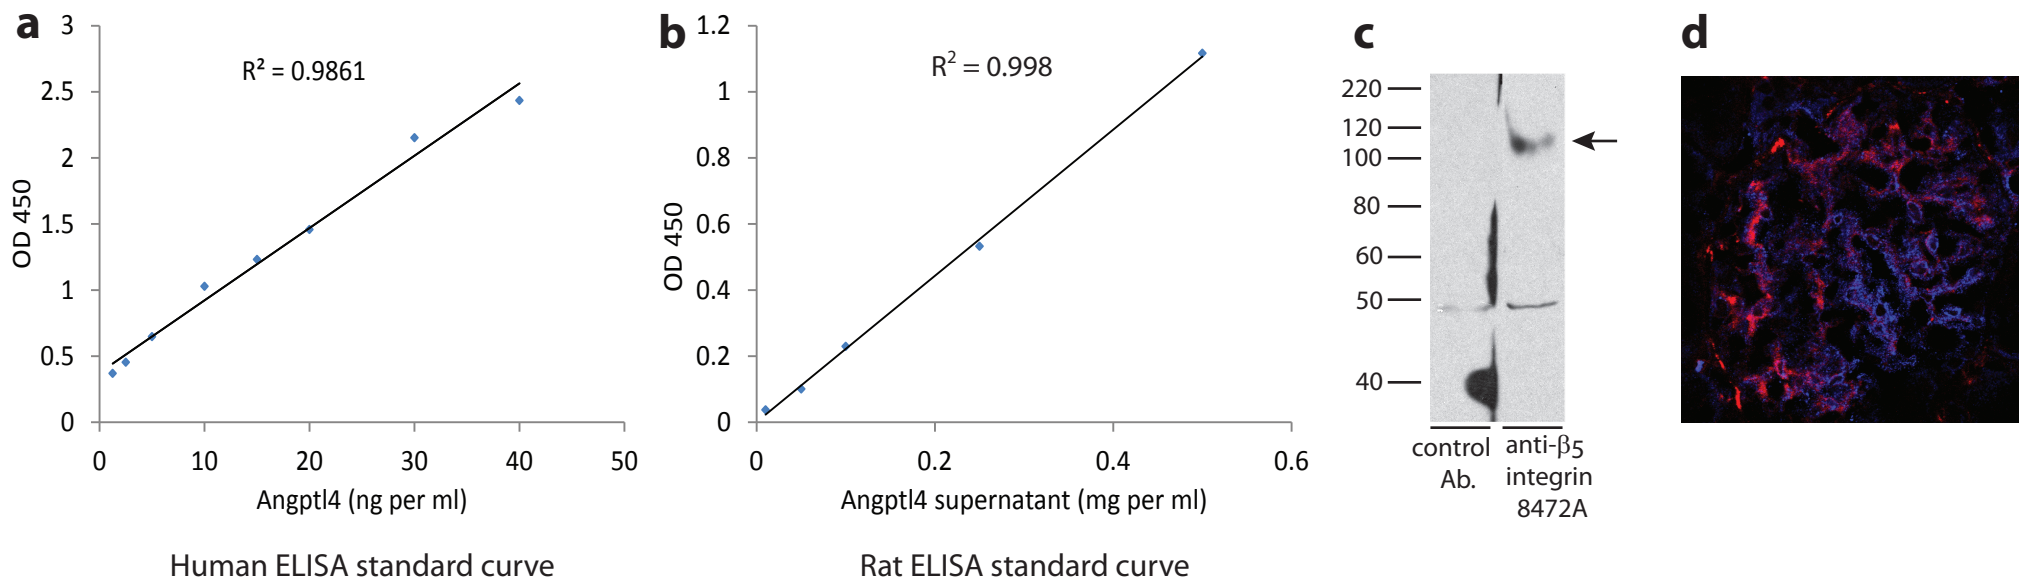

**Supplementary Figure 6:** Methods section data. **(a)** Standard curve for human Angptl4 ELISA. **(b)** Standard curve for rat Angptl4 ELISA. **(c)** Characterization of the anti- $\beta_5$  integrin antibody 8472A by reducing SDS PAGE and Western blot of rat glomerular protein. **(d)** Confocal imaging to demonstrate co-localization (magenta color) of the anti- $\beta_5$  integrin antibody (red, detected using donkey anti-rabbit IgG) with glomerular endothelium (blue, labeled with mouse anti-PECAM1 antibody) 3 hours after intravenous injection into a Sprague Dawley rat.
